# Supplementary material for: Drivers of Sinoatrial Node Automaticity in Zebrafish: Comparison With Mechanisms of Mammalian Pacemaker Function
Source: PubMed Central journal article supplement (PMC8919049; doi:10.3389/fphys.2022.818122), 2022-02-28
Supplement: Table_1.pdf [file Table_1.pdf]

**Supplementary Table 1. Composition of zebrafish and rabbit saline solutions.**

| <b>Substance / Parameter</b>     | <b>Zebrafish</b>                        | <b>Rabbit</b>                           | <b>Vendor (Catalogue)</b> |
|----------------------------------|-----------------------------------------|-----------------------------------------|---------------------------|
| NaCl                             | 120 mM                                  | 120 mM                                  | Sigma-Aldrich (S5886)     |
| KCl                              | 4.7 mM                                  | 4.7 mM                                  | Sigma-Aldrich (P5405)     |
| NaHCO <sub>3</sub>               | 26 mM                                   | 24 mM                                   | Sigma-Aldrich (S6297)     |
| NaH <sub>2</sub> PO <sub>4</sub> | 1.4 mM                                  | 1.4 mM                                  | Sigma-Aldrich (S0751)     |
| MgCl <sub>2</sub>                | 1.0 mM                                  | 1.0 mM                                  | Sigma-Aldrich (63020)     |
| CaCl <sub>2</sub>                | 1.8 mM                                  | 1.8 mM                                  | Sigma-Aldrich (21114)     |
| Glucose                          | 5.0 mM                                  | 10 mM                                   | Sigma-Aldrich (G8270)     |
| Osmolality                       | 290±5 mOsm/kg                           | 300±5 mOsm/kg                           | -                         |
| Bubbling                         | 95% O <sub>2</sub> / 5% CO <sub>2</sub> | 95% O <sub>2</sub> / 5% CO <sub>2</sub> | Linde Canada (MM OXCD5C)  |
| pH                               | 7.4                                     | 7.4                                     | -                         |
| Temperature (°C)                 | 28.0±0.5                                | 37.0±0.5                                | -                         |
