# Supplementary material for: Drivers of Sinoatrial Node Automaticity in Zebrafish: Comparison With Mechanisms of Mammalian Pacemaker Function
Source: PubMed Central journal article supplement (PMC8919049; doi:10.3389/fphys.2022.818122), 2022-02-28
Supplement: Table_2.pdf [file Table_2.pdf]

**Supplementary Table 2. Antagonists for block of coupled membrane-Ca<sup>2+</sup> oscillator pacemaker system.**

| Target                              | Antagonist                                     | Solvent          | [Stock]<br>(mM) | Stock<br>Volume (μL) | [Final]<br>(μM) | Time<br>(min) | Vendor<br>(Catalogue)      | References                                                                                                                                                                                       |
|-------------------------------------|------------------------------------------------|------------------|-----------------|----------------------|-----------------|---------------|----------------------------|--------------------------------------------------------------------------------------------------------------------------------------------------------------------------------------------------|
| HCN<br>Channels<br>(Intracellular)  | Ivabradine<br>Hydrochloride                    | H <sub>2</sub> O | 1               | 45                   | 3               | 40            | Sigma-Aldrich<br>(SML0281) | Bucchi et al., 2007; Thollon et al., 1994, 2007;<br>Yaniv et al., 2012, 2013, 2014                                                                                                               |
| HCN<br>Channels<br>(Extracellular)  | Cesium<br>Chloride<br>(CsCl)                   | H <sub>2</sub> O | 300             | 150                  | 3000            | 7             | Sigma-Aldrich<br>(C4036)   | Bogdanov et al., 2006; Dennis and Williams, 1986;<br>Denyer and Brown, 1990; Leitch et al., 1995;<br>Nikmaram et al., 1997; Noma et al., 1983;<br>Thollon et al., 2007; Zhang and Vassalle, 2000 |
| T-type Ca <sup>2+</sup><br>Channels | Nickel(II)<br>Chloride<br>(NiCl <sub>2</sub> ) | H <sub>2</sub> O | 10              | 248                  | 165*            | 15            | Sigma-Aldrich<br>(339350)  | Hagiwara et al., 1988; Satoh, 1995                                                                                                                                                               |
| Ryanodine<br>Receptors              | Ryanodine                                      | Ethanol          | 1               | 5                    | 1               | 15            | AbCam<br>(ab120083)        | Bogdanov et al., 2001, 2006; Bucchi et al., 2003, 2007;<br>Hata et al., 1996; Lancaster et al., 2004; Lyashkov et<br>al., 2007; Satoh, 1997; Vinogradova et al., 2002                            |
| Cytosolic<br>Ca <sup>2+</sup>       | BAPTA-AM                                       | DMSO             | 10              | 7.5                  | 5               | 30**          | Sigma-Aldrich<br>(A1076)   | Bogdanov et al., 2006; Vinogradova et al., 2000                                                                                                                                                  |
| L-type Ca <sup>2+</sup><br>Channels | Nifedipine                                     | DMSO             | 0.3             | 10                   | 0.2             | 15            | AbCam<br>(ab120135)        | Bogdanov et al., 2006; Budriesi, et al. 1998;<br>Kawai et al., 1981; Masumiyae et al., 1997;<br>Satoh and Tsuchida, 1993; Senges et al., 1983                                                    |
|                                     | Time (H <sub>2</sub> O)                        | -                | -               | -                    | -               | 60            | -                          | -                                                                                                                                                                                                |
| Controls                            | DMSO                                           | -                | 100%            | 7.5                  | 0.05%           | 30***         | Sigma-Aldrich<br>(D2650)   | -                                                                                                                                                                                                |
|                                     | Ethanol                                        | -                | 100%            | 7.5                  | 0.05%           | 15            | Sigma-Aldrich<br>(493511)  | -                                                                                                                                                                                                |

\*Previous rabbit studies used 40-100 μM, however recent work in zebrafish used a higher concentration (Nemtsas et al., 2010), which preliminary experiments demonstrated was more effective.

\*\*Following 30 min of exposure there was a 30 min wait period in modified KH alone to allow for de-esterification of the acetoxymethyl (AM) group.

\*\*\*Followed same protocol as for BAPTA-AM, with 30 min of exposure followed by a 30 min wait period in modified KH alone, but with HR measurements made after 15 min for comparison with exposure to nifedipine.

DMSO, dimethyl sulfoxide; HCN, hyperpolarisation-activated cyclic nucleotide-gated.
