# Supplementary material for: Drivers of Sinoatrial Node Automaticity in Zebrafish: Comparison With Mechanisms of Mammalian Pacemaker Function
Source: PubMed Central journal article supplement (PMC8919049; doi:10.3389/fphys.2022.818122), 2022-02-28
Supplement: Table_3.pdf [file Table_3.pdf]

**Supplementary Table 3. Antibodies used for immunofluorescence.**

| <b>Antibody</b>                | <b>Host</b> | <b>Concentration</b> | <b>Vendor (Catalogue)</b>      |
|--------------------------------|-------------|----------------------|--------------------------------|
| HCN4                           | Rabbit      | 1:50                 | Alomone Labs<br>(APC-052)      |
| RyR                            | Mouse       | 1:100                | Fisher Scientific<br>(MA3-916) |
| AlexaFluor555<br>(anti-rabbit) | Goat        | 1:300                | Fisher Scientific<br>(A-21429) |
| AlexaFluor647<br>(anti-mouse)  | Goat        | 1:300                | Fisher Scientific<br>(A-21236) |
