# Supplementary material for: Drivers of Sinoatrial Node Automaticity in Zebrafish: Comparison With Mechanisms of Mammalian Pacemaker Function
Source: PubMed Central journal article supplement (PMC8919049; doi:10.3389/fphys.2022.818122), 2022-02-28
Supplement: Table_4.pdf [file Table_4.pdf]

**Supplementary Table 4. Composition of immunofluorescence solutions.**

| <b>Antibody Incubation</b>      | <b>Composition</b> | <b>Vendor (Catalogue)</b>   |
|---------------------------------|--------------------|-----------------------------|
| Phosphate Buffered Saline (PBS) | 0.01 M (phosphate) | Sigma-Aldrich (P3813)       |
| NaCl                            | 0.138 M            | Sigma-Aldrich (S5886)       |
| KCl                             | 0.0027 M           | Sigma-Aldrich (P5405)       |
| Dimethyl Sulfoxide (DMSO)       | 65 mM              | Fisher Scientific (BP231-1) |
| Triton X-100                    | 10 $\mu$ M         | Sigma-Aldrich (T9284)       |
| Bovine Serum Albumin (BSA)      | 0.1% w/v           | Sigma-Aldrich (T9284)       |

  

| <b>CUBIC-R1</b>         | <b>Composition</b> | <b>Vendor (Catalogue)</b>   |
|-------------------------|--------------------|-----------------------------|
| Urea                    | 25% w/w            | Fisher Scientific (U15-500) |
| N',N',N',N'-Tetrakis    | 25% w/w            | Sigma-Aldrich (122262)      |
| Triton X-100            | 15% w/w            | Sigma-Aldrich (T9284)       |
| Type 1 H <sub>2</sub> O | 35% w/w            | -                           |
