# Supplementary material for: Drivers of Sinoatrial Node Automaticity in Zebrafish: Comparison With Mechanisms of Mammalian Pacemaker Function
Source: PubMed Central journal article supplement (PMC8919049; doi:10.3389/fphys.2022.818122), 2022-02-28
Supplement: Table_5.pdf [file Table_5.pdf]

**Supplementary Table 5. Effects of pharmacological block of membrane and Ca<sup>2+</sup> ‘clock’ components on heart rate (HR) and the inter-beat variability of cycle length (measured as the root mean square of its successive differences, RMSSD<sub>CL</sub>) in the isolated zebrafish heart.**

| Membrane ‘Clock’ Components         |                                          |                   |                    |                 |                                   |                                    |                 |                   |
|-------------------------------------|------------------------------------------|-------------------|--------------------|-----------------|-----------------------------------|------------------------------------|-----------------|-------------------|
| Target                              | Antagonist                               | Pre-drug HR (bpm) | Post-drug HR (bpm) | <i>p</i> -value | Pre-drug RMSSD <sub>CL</sub> (ms) | Post-drug RMSSD <sub>CL</sub> (ms) | <i>p</i> -value | <i>n</i> (Hearts) |
| HCN Channels (Intracellular)        | Ivabradine Hydrochloride                 | 194 ± 13          | 26 ± 6*            | <0.001          | 2.5 ± 0.5                         | 106.3 ± 25.1*                      | 0.006           | 7                 |
| HCN Channels (Extracellular)        | Cesium Chloride (CsCl)                   | 190 ± 13          | 50 ± 7*            | <0.001          | 3.0 ± 0.7                         | 43.8 ± 12.9*                       | 0.023           | 6                 |
| T-type Ca <sup>2+</sup> Channels    | Nickel(II) Chloride (NiCl <sub>2</sub> ) | 178 ± 14          | 160 ± 13*          | 0.016           | 3.9 ± 0.7                         | 6.1 ± 1.4                          | 0.100           | 7                 |
| Ca <sup>2+</sup> ‘Clock’ Components |                                          |                   |                    |                 |                                   |                                    |                 |                   |
| Target                              | Antagonist                               | Pre-drug HR (bpm) | Post-drug HR (bpm) | <i>p</i> -value | Pre-drug RMSSD <sub>CL</sub> (ms) | Post-drug RMSSD <sub>CL</sub> (ms) | <i>p</i> -value | <i>n</i> (Hearts) |
| Ryanodine Receptors                 | Ryanodine                                | 148 ± 12          | 80 ± 9*            | 0.005           | 11.7 ± 3.8                        | 54.4 ± 14.2*                       | 0.036           | 6                 |
| Cytosolic Ca <sup>2+</sup>          | BAPTA-AM                                 | 168 ± 17          | 125 ± 20*          | 0.029           | 4.1 ± 0.3                         | 5.5 ± 0.9                          | 0.198           | 7                 |
| L-type Ca <sup>2+</sup> Channels    | Nifedipine                               | 209 ± 14          | 208 ± 11           | 0.813           | 2.4 ± 0.7                         | 2.8 ± 0.6                          | 0.626           | 6                 |
| Controls                            |                                          |                   |                    |                 |                                   |                                    |                 |                   |
| Target                              |                                          | Pre-drug HR (bpm) | Post-drug HR (bpm) | <i>p</i> -value | Pre-drug RMSSD <sub>CL</sub> (ms) | Post-drug RMSSD <sub>CL</sub> (ms) | <i>p</i> -value | <i>n</i> (Hearts) |
| Time (H <sub>2</sub> O)             |                                          | 189 ± 10          | 197 ± 9            | 0.239           | 5.7 ± 2.4                         | 3.5 ± 0.5                          | 0.341           | 7                 |
| DMSO                                |                                          | 172 ± 15          | 168 ± 15           | 0.300           | 3.8 ± 1.4                         | 4.1 ± 1.2                          | 0.660           | 6                 |
| Ethanol                             |                                          | 187 ± 10          | 184 ± 11           | 0.354           | 3.3 ± 0.5                         | 3.9 ± 0.6                          | 0.077           | 8                 |

Data is shown as mean ± standard error of the mean (SEM), and compared by paired, two-tailed, Student’s T-tests; \**p*<0.05 vs pre-drug.

HCN, hyperpolarisation-activated cyclic nucleotide-gated.
