# Supplementary material for: Drivers of Sinoatrial Node Automaticity in Zebrafish: Comparison With Mechanisms of Mammalian Pacemaker Function
Source: PubMed Central journal article supplement (PMC8919049; doi:10.3389/fphys.2022.818122), 2022-02-28
Supplement: Table_6.pdf [file Table_6.pdf]

**Supplementary Table 6. Action potential (AP) characteristics from the sinoatrial node, atrium, and ventricle with and without blebbistatin.**

| <b>Sinoatrial Node (SAN)</b> |                                                           |                                                                |                                      |                                     |                                        |
|------------------------------|-----------------------------------------------------------|----------------------------------------------------------------|--------------------------------------|-------------------------------------|----------------------------------------|
| <b>AP Parameter</b>          | <b>Control<br/>(<i>n</i> impalements= 10)<sup>†</sup></b> | <b>Blebbistatin<br/>(<i>n</i> impalements= 11)<sup>†</sup></b> | <b><i>p</i>-value<br/>vs Control</b> | <b><i>p</i>-value<br/>vs Atrium</b> | <b><i>p</i>-value<br/>vs Ventricle</b> |
| Heart Rate (bpm)             | 140 ± 4                                                   | 133 ± 8                                                        | 0.463                                | -                                   | -                                      |
| Slope of DD (mV/s)           | 28 ± 4                                                    | 17 ± 2*                                                        | 0.028                                | -                                   | -                                      |
| MDP (mV)                     | -46 ± 3 <sup>A,V</sup>                                    | -42 ± 2                                                        | 0.285                                | 0.049                               | 0.008                                  |
| dV/dt <sub>max</sub> (mV/ms) | 9.6 ± 1.4 <sup>A,V</sup>                                  | 10.1 ± 1.3                                                     | 0.782                                | <0.001                              | 0.020                                  |
| AP Amplitude (mV)            | 59 ± 5 <sup>A,V</sup>                                     | 53 ± 3                                                         | 0.295                                | 0.001                               | <0.001                                 |
| Max V <sub>m</sub>           | 14 ± 3 <sup>A,V</sup>                                     | 12 ± 2                                                         | 0.542                                | <0.001                              | <0.001                                 |
| APD <sub>50</sub> (ms)       | 63 ± 3 <sup>A,V</sup>                                     | 62 ± 3                                                         | 0.799                                | 0.005                               | <0.001                                 |
| APD <sub>80</sub> (ms)       | 78 ± 3 <sup>A,V</sup>                                     | 76 ± 3                                                         | 0.711                                | 0.032                               | <0.001                                 |
| <b>Atrium</b>                |                                                           |                                                                |                                      |                                     |                                        |
| <b>AP Parameter</b>          | <b>Control<br/>(<i>n</i> impalements= 14)<sup>†</sup></b> | <b>Blebbistatin<br/>(<i>n</i> impalements= 17)<sup>†</sup></b> | <b><i>p</i>-value<br/>vs Control</b> | <b><i>p</i>-value<br/>vs SAN</b>    | <b><i>p</i>-value<br/>vs Ventricle</b> |
| Resting V <sub>m</sub> (mV)  | -65 ± 2 <sup>S</sup>                                      | -60 ± 2                                                        | 0.149                                | 0.049                               | 0.930                                  |
| dV/dt <sub>max</sub> (mV/ms) | 19.6 ± 0.9 <sup>S,V</sup>                                 | 18.2 ± 1.0                                                     | 0.329                                | <0.001                              | 0.020 <sup>#</sup>                     |
| AP Amplitude (mV)            | 92 ± 3 <sup>S</sup>                                       | 88 ± 5                                                         | 0.475                                | 0.001                               | 0.925                                  |
| Max V <sub>m</sub>           | 28 ± 2 <sup>S</sup>                                       | 28 ± 2                                                         | 0.891                                | <0.001                              | 0.958                                  |
| APD <sub>50</sub> (ms)       | 87 ± 3 <sup>S,V</sup>                                     | 99 ± 3*                                                        | 0.006                                | 0.005                               | <0.001                                 |
| APD <sub>80</sub> (ms)       | 108 ± 2 <sup>S,V</sup>                                    | 117 ± 3*                                                       | 0.012                                | 0.032                               | <0.001                                 |
| <b>Ventricle</b>             |                                                           |                                                                |                                      |                                     |                                        |
| <b>AP Parameter</b>          | <b>Control<br/>(<i>n</i> impalements= 21)<sup>†</sup></b> | <b>Blebbistatin<br/>(<i>n</i> impalements= 24)<sup>†</sup></b> | <b><i>p</i>-value<br/>vs Control</b> | <b><i>p</i>-value<br/>vs SAN</b>    | <b><i>p</i>-value<br/>vs Atrium</b>    |
| Resting V <sub>m</sub> (mV)  | -66 ± 2 <sup>S</sup>                                      | -64 ± 1                                                        | 0.451                                | 0.008                               | 0.930                                  |
| dV/dt <sub>max</sub> (mV/ms) | 16.8 ± 1.0 <sup>S,A</sup>                                 | 17.3 ± 0.7                                                     | 0.684                                | 0.020                               | 0.020                                  |
| AP Amplitude (mV)            | 94 ± 3 <sup>S</sup>                                       | 92 ± 3                                                         | 0.585                                | <0.001                              | 0.925                                  |
| Max V <sub>m</sub>           | 28 ± 1 <sup>S</sup>                                       | 27 ± 2                                                         | 0.746                                | <0.001                              | 0.958                                  |
| APD <sub>50</sub> (ms)       | 234 ± 4 <sup>S,A</sup>                                    | 221 ± 6                                                        | 0.072                                | <0.001                              | <0.001                                 |
| APD <sub>80</sub> (ms)       | 271 ± 5 <sup>S,A</sup>                                    | 248 ± 5*                                                       | 0.003                                | <0.001                              | <0.001                                 |

Data is shown as mean ± standard error of the mean (SEM), and compared by unpaired, one-way ANOVA and Tukey post hoc tests (<sup>A</sup>*p*<0.05 vs atrium; <sup>V</sup>*p*<0.05 vs ventricle; <sup>S</sup>*p*<0.05 vs SAN) or unpaired, two-tailed, Student's T-tests (<sup>\*</sup>*p*<0.05 vs control). <sup>†</sup>All data acquired in *N* = 6 hearts.

APD<sub>50</sub> and APD<sub>80</sub>, AP duration at 50% and 80% repolarisation; DD, diastolic depolarisation; dV/dt<sub>max</sub>, maximum rate of change of V<sub>m</sub> during the AP upstroke; MDP, maximum diastolic potential; V<sub>m</sub>, membrane potential.
